# Supplementary material
Source: Research Square preprint supplement (doi:10.21203/rs.3.rs-8836396/v1)
Supplement: Supplementary file 1 [file 73ede137f1c678f566c768f8.docx]

Additional file 8. Gambling behavior at the final observation point by treatment duration and program participation.

| Treatment duration | | Group | | n (%) | | |
| --- | --- | --- | --- | --- | --- | --- |
| ≥ 3 months | | Non-participation (n=17) | | 11 (64.7%) | | |
|  |  | Participation (n=63) | | 31 (49.2%) | | |
|  |  |  |  |  |  |
| ≥ 6months | | Non-participation (n=13) | | 9 (69.2%) | | |
|  |  | Participation (n=54) | | 28 (51.9%) | | |
|  |  |  |  |  |  |
| < 3 months | | Non-participation (n=38) | | 25 (65.8%) | | |
|  |  | Participation (n=19) | | 1 (5.3%) | | |

Gambling behavior was assessed descriptively according to treatment duration and program participation at the final observation point. Data are presented as n (%).
