# Supplementary material
Source: Research Square preprint supplement (doi:10.21203/rs.3.rs-8836396/v1)
Supplement: Supplementary file 7 [file ef6b7ce102c820cf3fd9e1fc.docx]

Additional file 2. Treatment retention rates at 30 days and 3, 6, and 12 months by program participation status.

| Time point | Non-participation group (n=55) | Participation group (n=82) | p-value |
| --- | --- | --- | --- |
| 30 days | 25 (45.5%) | 73 (89.0%) | ＜0.001 |
| 3 months | 17 (30.9%) | 63 (76.8%) | ＜0.001 |
| 6 months | 13 (23.6%) | 54 (65.9%) | ＜0.001 |
| 12 months | 11 (20.0%) | 41 (50.0%) | ＜0.001 |

Data are presented as n (%). Group comparisons were performed using the chi-squared test.
